# Supplementary material for: In Vivo Evaluation of ECP Peptide Analogues for the Treatment of Acinetobacter baumannii Infection
Source: MDPI journal article supplement (doi:10.3390/biomedicines10020386), 2022-02-05
Supplement: s1 [file s1]

## Supplementary Materials

# *In Vivo* Evaluation of ECP Peptide Analogues for the Treatment of *Acinetobacter baumannii* Infection

Jiarui Li <sup>1</sup>, Guillem Prats-Ejarque <sup>1</sup>, Marc Torrent <sup>1</sup>, David Andreu <sup>2</sup>, Klaus Brandenburg <sup>3</sup>, Pablo Fernández-Millán <sup>1</sup> and Ester Boix <sup>1,\*</sup>

<sup>1</sup> Department of Biochemistry and Molecular Biology, Faculty of Biosciences, UAB, Cerdanyola del Vallès, Spain; jiarui.li@e-campus.uab.cat (JL), Guillem.Prats.Ejarque@uab.cat (GPE), Marc.Torrent@uab.cat (MT), Pablo.fernandez@uab.cat (PFM), Ester.Boix@uab.cat (EB)

<sup>2</sup> Department of Experimental and Health Sciences, Universitat Pompeu Fabra, Barcelona Biomedical Research Park, Barcelona, Spain; david.andreu@upf.edu

<sup>3</sup> Brandenburg Antiinfektiva GmbH, c/o Forschungszentrum Borstel, Borstel, Germany; kbranden@gmx.de

\* Correspondence: Ester.Boix@uab.cat

**Table S1.** Sample sizes and administration times in each group for the main toxicity study.

| Group         | Dose (mg/kg) | Sample size (number of mice) | Day 0 |      | Day 1 |      | Day 2 |      |
|---------------|--------------|------------------------------|-------|------|-------|------|-------|------|
|               |              |                              | A.M.  | P.M. | A.M.  | P.M. | A.M.  | P.M. |
| Vehicle (HBS) |              | 3                            | ✓     | ✓    | ✓     | ✓    | ✓     | ✓    |
|               | 20           | 6                            | ✓     |      | ✓     |      |       |      |
| ECPep-D       | 15           | 6                            | ✓     | ✓    |       | ✓    |       | ✓    |
|               | 7.5          | 1                            | ✓     |      | ✓     |      | ✓     |      |
|               | 25           | 6                            | ✓     | ✓    | ✓     |      | ✓     |      |
| ECPep-2D-Orn  | 20           | 6                            | ✓     | ✓    | ✓     |      | ✓     |      |
|               | 10           | 2                            | ✓     |      | ✓     |      | ✓     |      |
|               | 7.5          | 2                            | ✓     | ✓    | ✓     | ✓    | ✓     | ✓    |
|               |              |                              |       |      |       |      |       |      |

✓ means administration at the corresponding time. A.M. means administration in the morning (around 9:00) and P.M. means administration in the afternoon (around 20:00). Owing to uncertainty of clinical reaction of the mice, the time planned to perform the following administration was decided based on the clinical symptoms observed after the previous administration dose.

**Table S2.** Assessment of general health status.

| Clinical assessment      | Score definition*                                                                                                                                                                                                                                                                                                                                                                                |
|--------------------------|--------------------------------------------------------------------------------------------------------------------------------------------------------------------------------------------------------------------------------------------------------------------------------------------------------------------------------------------------------------------------------------------------|
| Body weight              | 0: body weight gain<br>1: no body weight gain/body weight loss <10% of the initial body weight<br>2: body weight loss between 10-20%<br>3: body weight loss >20%                                                                                                                                                                                                                                 |
| Motor activity           | 0: normal<br>1: decreased motor activity, lameness, ataxia<br>2: need to be forced to stand up, partial paralysis<br>3: prostration, complete paralysis, dose no stand up when forced                                                                                                                                                                                                            |
| General appearance       | 0: normal<br>1: less grooming than normal, mild piloerection<br>2: moderate piloerection and lesions in the coat, hunched posture<br>3: severe piloerection and lesions in the coat (ulcerative dermatitis)                                                                                                                                                                                      |
| Behaviour                | 0: normal/social behaviour<br>1: excitation/depressed<br>2: exacerbated reactions to external stimuli/no reaction to external stimuli<br>3: aggressiveness/stupor                                                                                                                                                                                                                                |
| Secretions               | 0: no secretion<br>1: mild secretion<br>2: severe secretion<br>3: haemorrhage/purulent secretion                                                                                                                                                                                                                                                                                                 |
| Hydroneurion status      | 0: normal<br>1: long skin-tent duration<br>3: long skin-tent duration + enophthalmos                                                                                                                                                                                                                                                                                                             |
| Breathing                | 0: normal<br>1: mild dyspnoea or tachypnoea<br>3: moderate dyspnoea or tachypnoea + prostration                                                                                                                                                                                                                                                                                                  |
| Hypovolemia signs        | 0: mucous rose-coloured<br>1: mucous paleness<br>2: moderate mucous paleness and dry<br>3: moderate mucous paleness and dry + tachypnoea                                                                                                                                                                                                                                                         |
| Urination and defecation | 1: feces and/or urine in very small quantities or slightly dark/orange or another colour appearance<br>2: feces and/or dark/pink urine excretion indication blood. appreciation of dilated bladder and/or hardened abdomen<br>3: dark feces and dark pink urine excretion indication blood. appreciation of dilated bladder and hardened abdomen, stained perineal area. completely liquid feces |

\* Sum of the score: 0-2: No alterations. Procedure will be continued; 3-6: Monitoring will be intensified. ≥ 7: Euthanasia will be considered.

**Table S3.** Cytotoxicity of ECP-derived peptides and colistin.

|                      | <b>IC<sub>50</sub><sup>a</sup> (HEK293T)</b> |                |
|----------------------|----------------------------------------------|----------------|
|                      | <b>48h</b>                                   |                |
|                      | <b>μM</b>                                    | <b>μg/mL</b>   |
| <b>EC Pep-D</b>      | 63.60 ± 5.88                                 | 239.00 ± 22.10 |
| <b>EC Pep-2D-Orn</b> | >100                                         | >350.52        |
| <b>Colistin</b>      | >300                                         | >380.26        |

<sup>a</sup>IC<sub>50</sub> is the cytotoxic concentration of the agents to cause death to 50% of viable cells. Each assay was done in triplicate by the MTT assay and normalized by no-treated control. Values are presented by Mean ± SE. N.D. indicates that no reduction of cell viability was detected at the highest concentration.

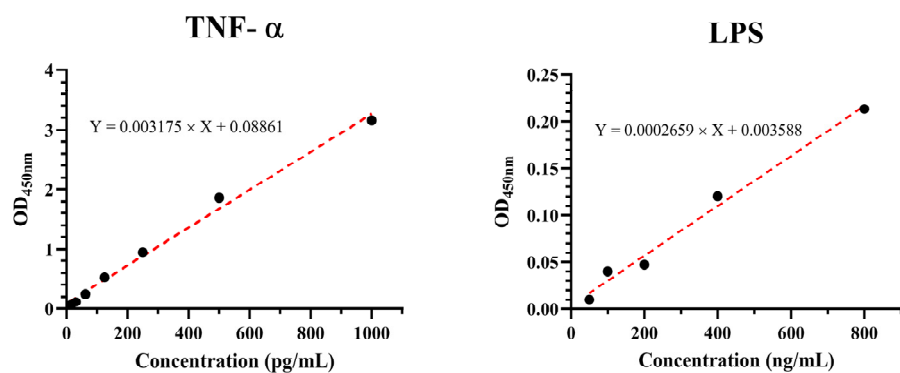

**Figure S1.** Standard curve of TNF- $\alpha$  and LPS tested by ELISA. The curve and the equation of the TNF- $\alpha$  and LPS concentration relative to OD<sub>450</sub> obtained from the curve fit by linear regression.

## a) ECPep-L

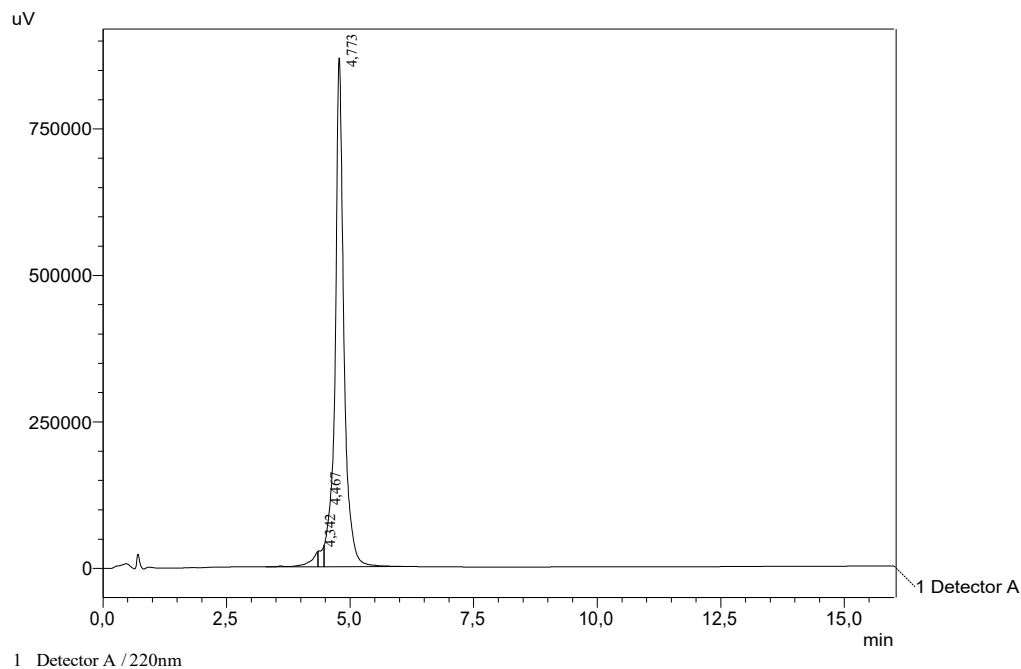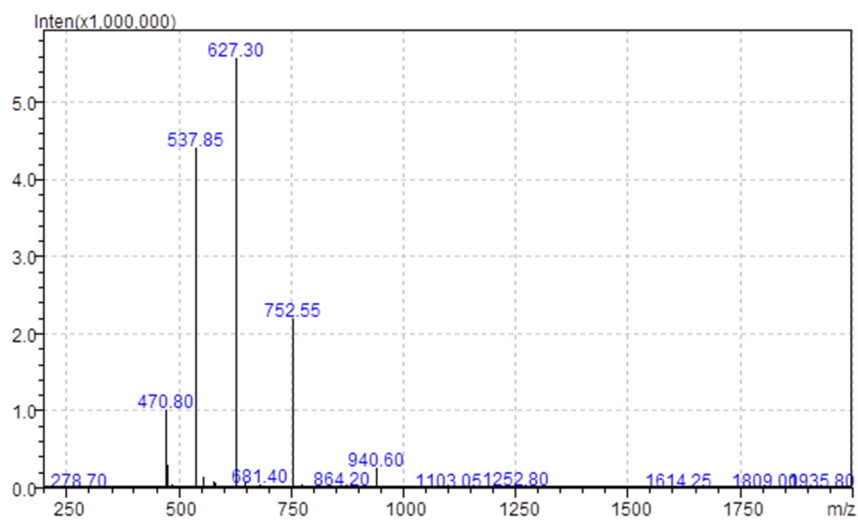

## Positively charged ion series

| Ch.   | Average   | Monolso.  |
|-------|-----------|-----------|
| MH1+  | 3758.4016 | 3756.0193 |
| MH2+  | 1879.7044 | 1878.5133 |
| MH3+  | 1253.4720 | 1252.6780 |
| MH4+  | 940.3559  | 939.7603  |
| MH5+  | 752.4861  | 752.0097  |
| MH6+  | 627.2397  | 626.8426  |
| MH7+  | 537.7779  | 537.4376  |
| MH8+  | 470.6816  | 470.3838  |
| MH9+  | 418.4955  | 418.2308  |
| MH10+ | 376.7467  | 376.5085  |

## b) ECPep-D

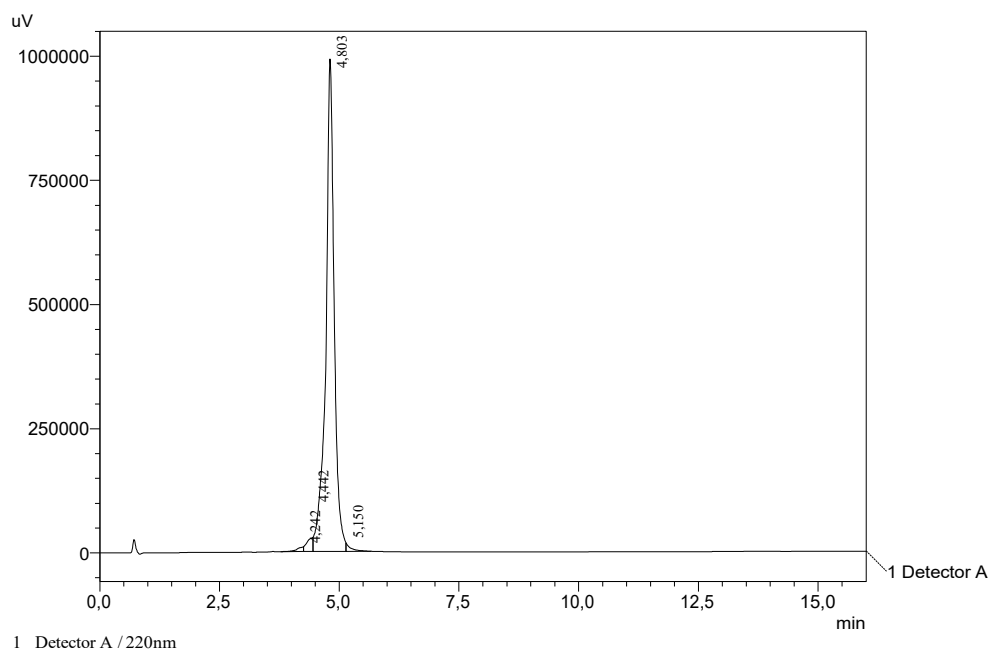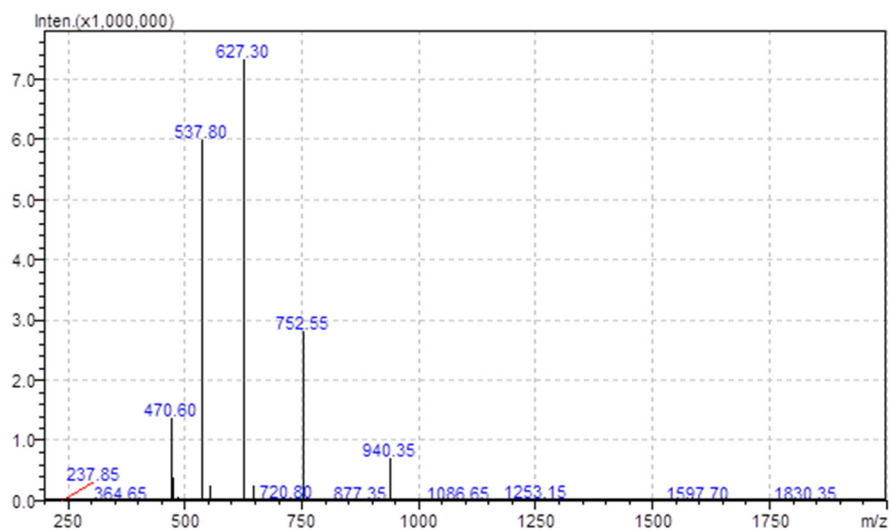

## Positively charged ion series

| Ch.   | Average   | Monoliso. |
|-------|-----------|-----------|
| MH1+  | 3758.4016 | 3756.0193 |
| MH2+  | 1879.7044 | 1878.5133 |
| MH3+  | 1253.4720 | 1252.6780 |
| MH4+  | 940.3559  | 939.7603  |
| MH5+  | 752.4861  | 752.0097  |
| MH6+  | 627.2397  | 626.8426  |
| MH7+  | 537.7779  | 537.4376  |
| MH8+  | 470.6816  | 470.3838  |
| MH9+  | 418.4955  | 418.2308  |
| MH10+ | 376.7467  | 376.5085  |

## c) ECPep-2D-Orn

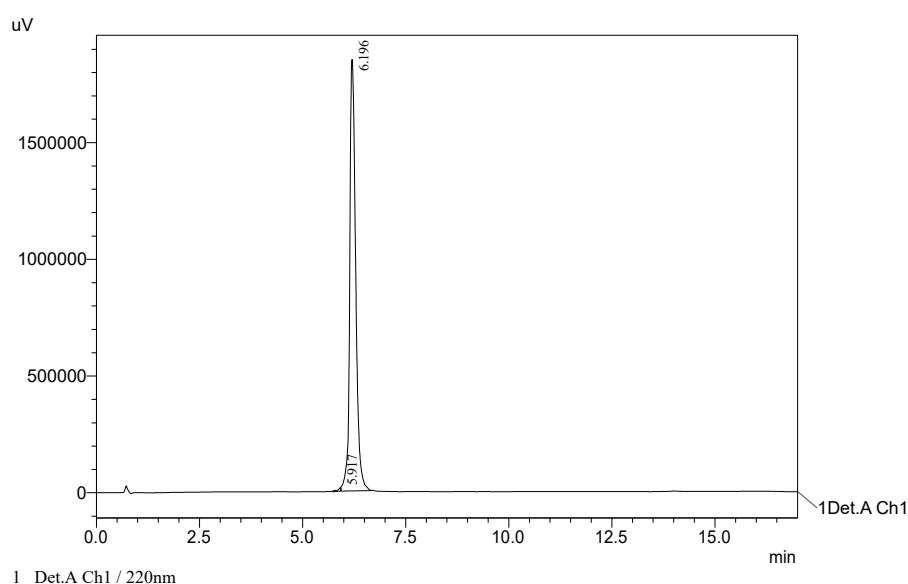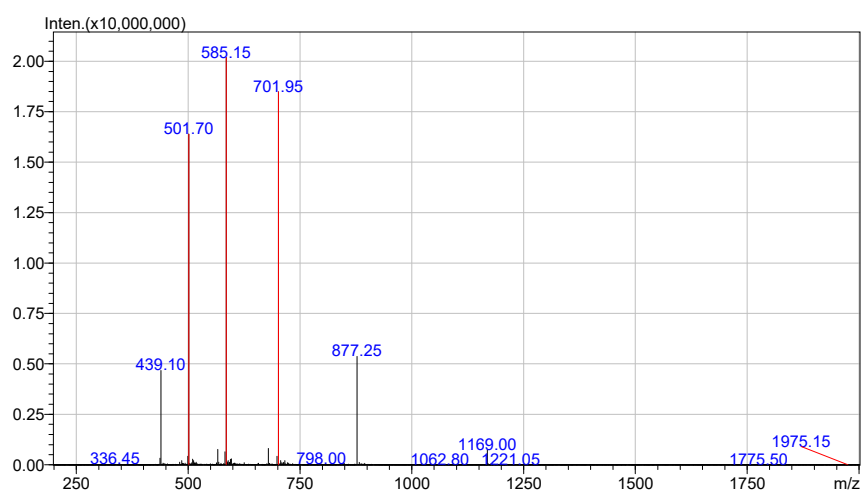

## Positively charged ion series

| Ch.   | Average   | Monoliso. |
|-------|-----------|-----------|
| MH1+  | 3506.1599 | 3503.8885 |
| MH2+  | 1753.5836 | 1752.4479 |
| MH3+  | 1169.3915 | 1168.6344 |
| MH4+  | 877.2954  | 876.7276  |
| MH5+  | 702.0378  | 701.5835  |
| MH6+  | 585.1994  | 584.8208  |
| MH7+  | 501.7434  | 501.4189  |
| MH8+  | 439.1514  | 438.8674  |
| MH9+  | 390.4687  | 390.2163  |
| MH10+ | 351.5225  | 351.2954  |

**Figure S2.** RP-HPLC and MS chromatograms of **a)** ECPep-L, **b)** ECPep-D and **c)** ECPep-2D-Orn. The Luna C<sub>18</sub> (4.6 × 50 mm, 3 μm; Phenomenex) column was used to purify the peptides using the following gradient: buffer B (0.036% TFA in Acetonitrile) into buffer A (0.045% TFA in H<sub>2</sub>O) over 15 min at 1 mL/min. Signal was registered at 220nm. The XBridge column C<sub>18</sub> (4.6 × 150 mm, 3.5 μm, Waters) was then applied to check the MS of peptides with gradient buffer A (0.1% formic acid in water) and buffer B (0.08% formic acid in acetonitrile), 15 min at 1 mL/min, 220nm.

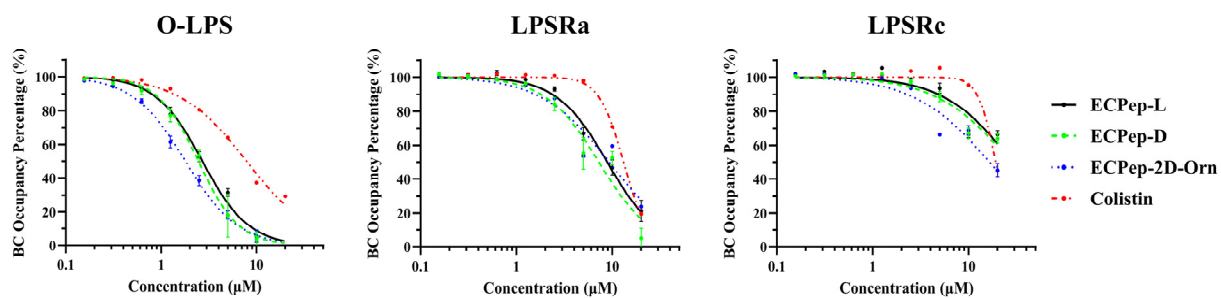

**Figure S3.** BODIPY-Cadaverine displacement curves for peptides and colistin. The curve was fitted by with nonlinear fit with normalized response.



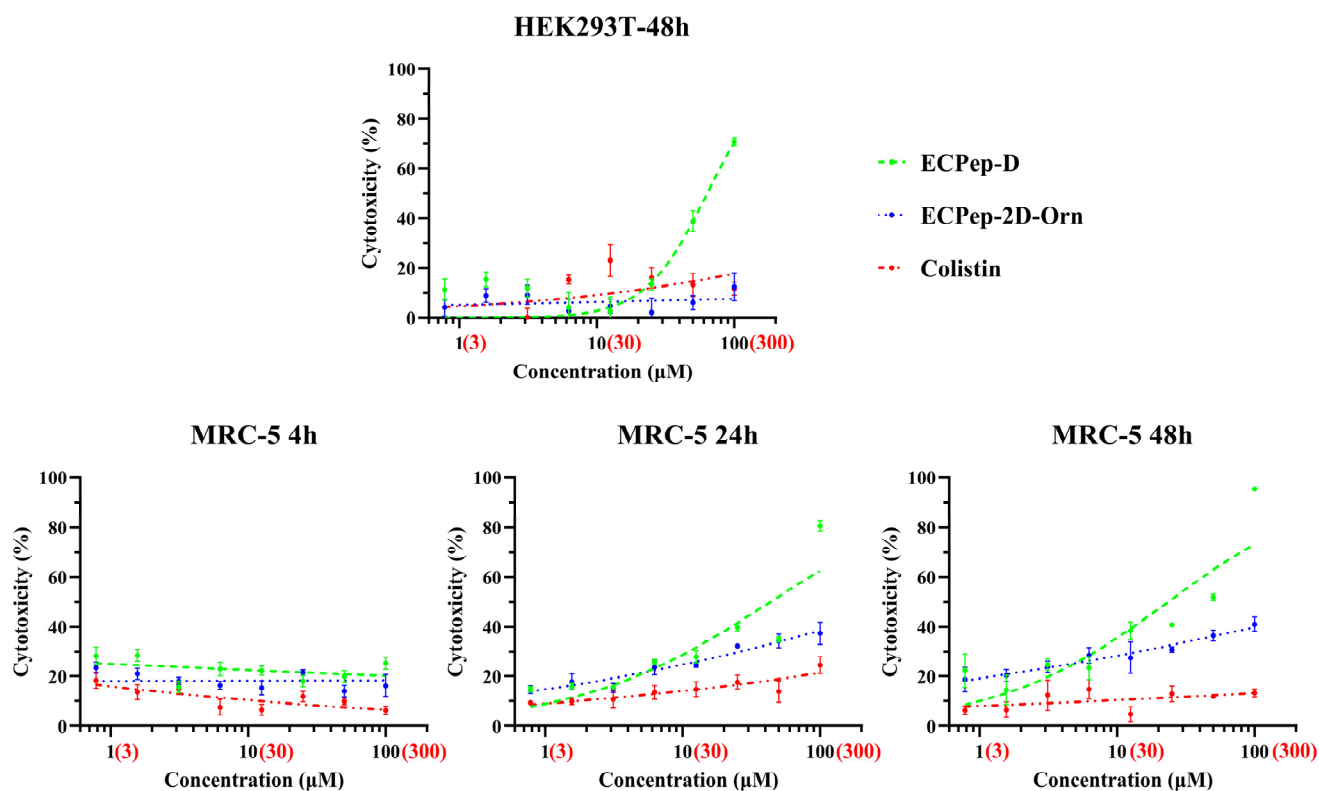

**Figure S4.** Cytotoxicity curves for peptides and colistin. The curve was fitted by with nonlinear fit with normalized response. The concentration of peptide was indicated in x-axis with black (0-100  $\mu\text{M}$ ) and that of colistin with red (0-300  $\mu\text{M}$ ).

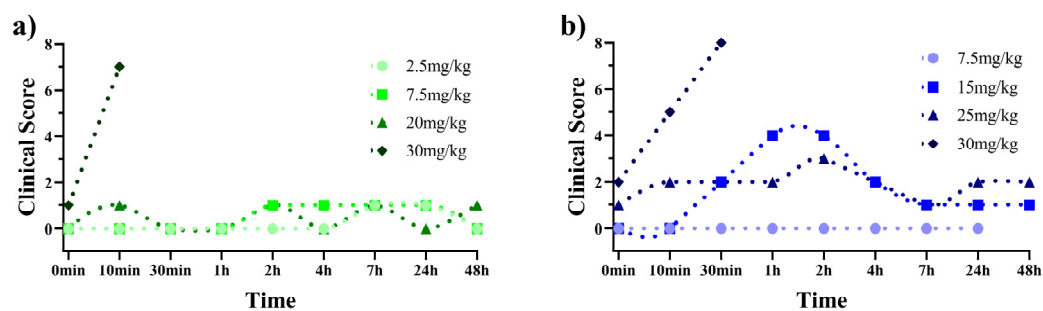

**Figure S5.** “Up and Down” assay. **a)** Clinical scores of ECPep-D at different concentration within 2 days. **b)** Clinical scores of ECPep-2D-Orn at different concentration within 2 days. Only 1 mouse in either group had been injected intraperitoneally from low dose to high dose and observed until 48h. The animal was euthanized when it had obvious clinical suffering.

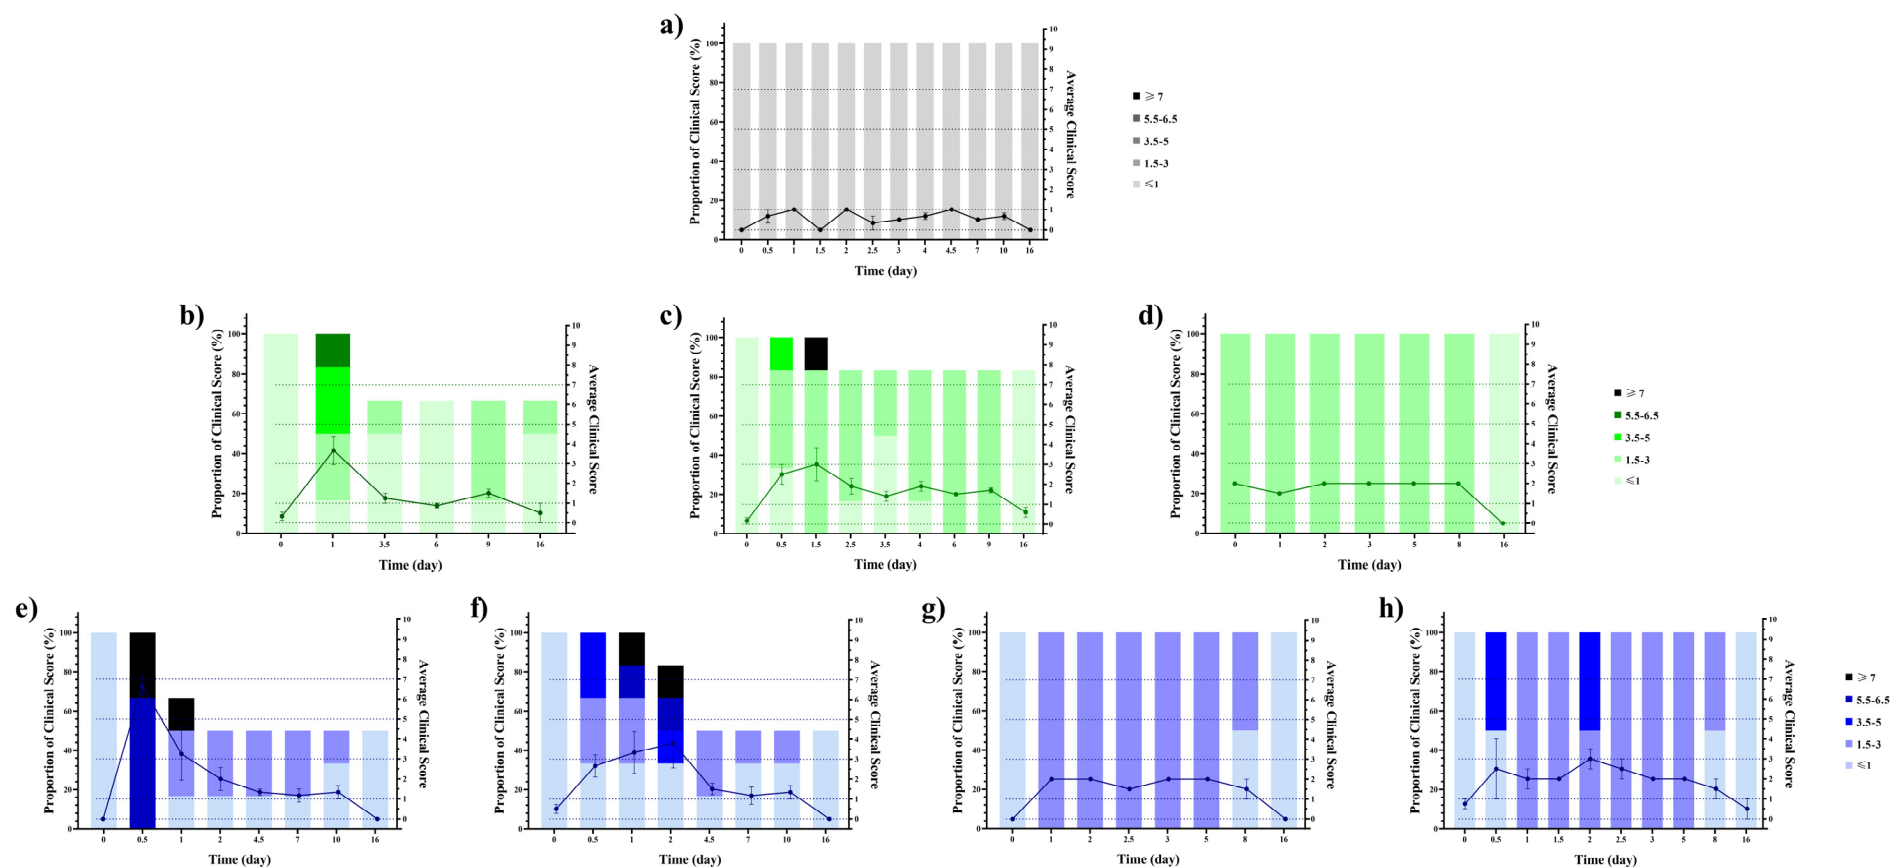

**Figure S6.** Changes of clinical score after each administration and survival percentages of animal for main toxicity assay. **a)** Clinical score at different days for Vehicle (HBS); **b-d)** Clinical score at different days for ECPep-D (b: 20 mg/kg, c: 15 mg/kg, d: 7.5 mg/kg); **e-h)** Clinical score at different days for ECPep-2D-Orn (e: 25 mg/kg, f: 20 mg/kg, g: 10 mg/kg, h: 7.5 mg/kg). In the first 3 days (from Day 0 to Day 2), which was the prescribed administration time, the clinical scores were recorded after each administration and from Day 3, when no administration were operated in any group, the clinical scores were only monitored at some specific days. The decrease of height of the column means euthanasia had been executed on the animal with high clinical score. Sample sizes and administration times in each group are indicated in Table S1.

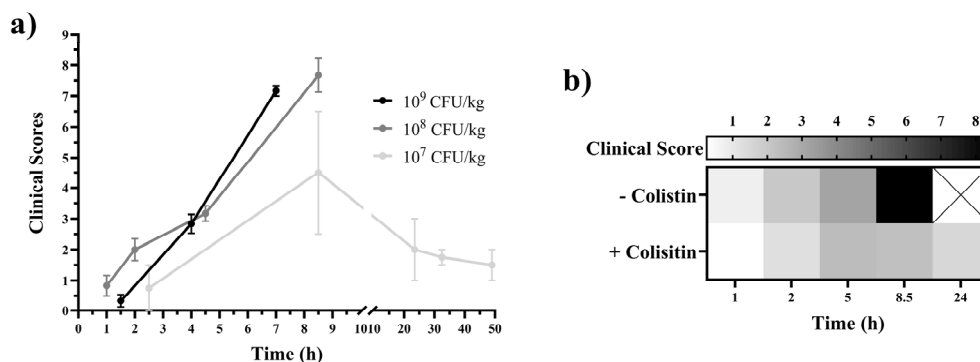

**Figure S7.** Clinical scores for the setting of murine acute infection model induced by *A. baumannii*. **a)** Time course change of mice clinical scores after incubation with different concentrations of *A. baumannii*. The treated groups were respectively 6 mice for  $10^9$  CFU/kg and  $10^8$  CFU/kg and 2 mice for  $10^7$  CFU/kg. **b)** Average clinical scores comparison of mice at different time points after incubation with  $10^8$  CFU/kg of *A. baumannii* in the absence or presence of colistin treatment. The treatment had been given at 2 h after bacteria administration. Four mice (2 male and 2 female) were used to compare between groups.

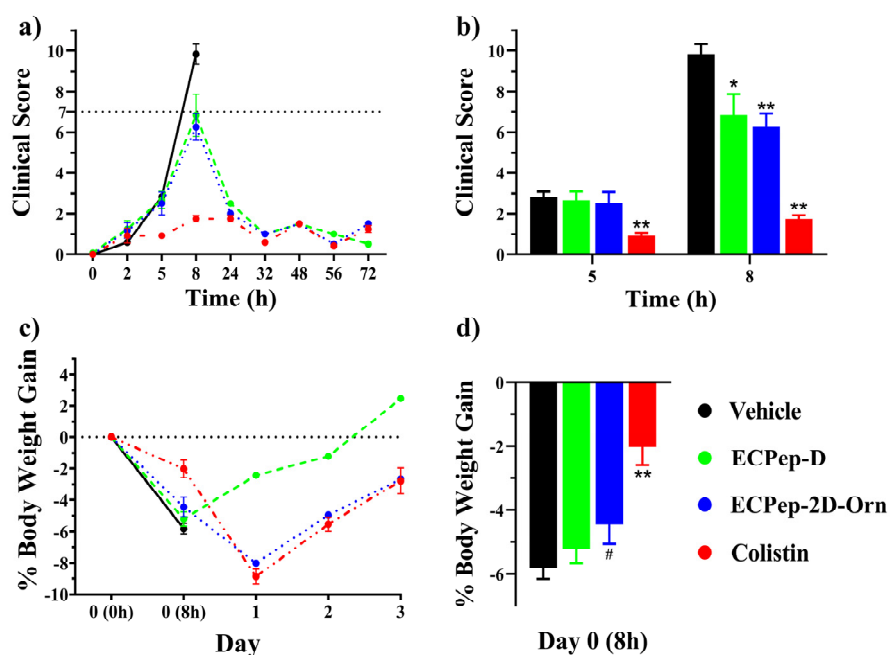

**Figure S8.** Changes clinical symptoms in 1st efficacy assays with 10 mg/kg peptides treatment. **a)** The average clinical score in 3 days; **b)** Histogram of clinical scores at 5 hours and 8 hours; **c)** The average body weight gain (%) at different hours in 3 days; **d)** Histogram of body weight gain (%) at 8 hours. Each animal had been inoculated  $10^8$  CFU/kg *A. baumannii* with 5% mucin before the first treatment. The different treatments were given 2 hours later after the bacteria inoculation respectively and last 3 days. Values are presented by mean  $\pm$  SEM. Mann-Whitney test has been used for statistical comparison between different treatments and vehicle (\*\* $P < 0.01$ , \* $P < 0.05$ , # $P < 0.1$ ).

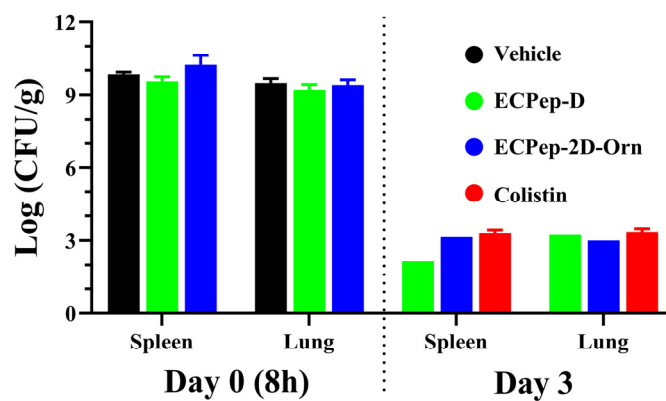

**Figure S9.** The average CFUs in organs (spleen and lung) of infected mice in the 1st efficacy assay with 10 mg/kg peptides treatment. Each animal had been inoculated  $10^8$  CFU/Kg *A. baumannii* with 5% mucin before treatment. Treatments were given 2 hours later after the bacteria inoculation respectively and last 3 days for the survival ones. Values are presented by mean  $\pm$  SEM.

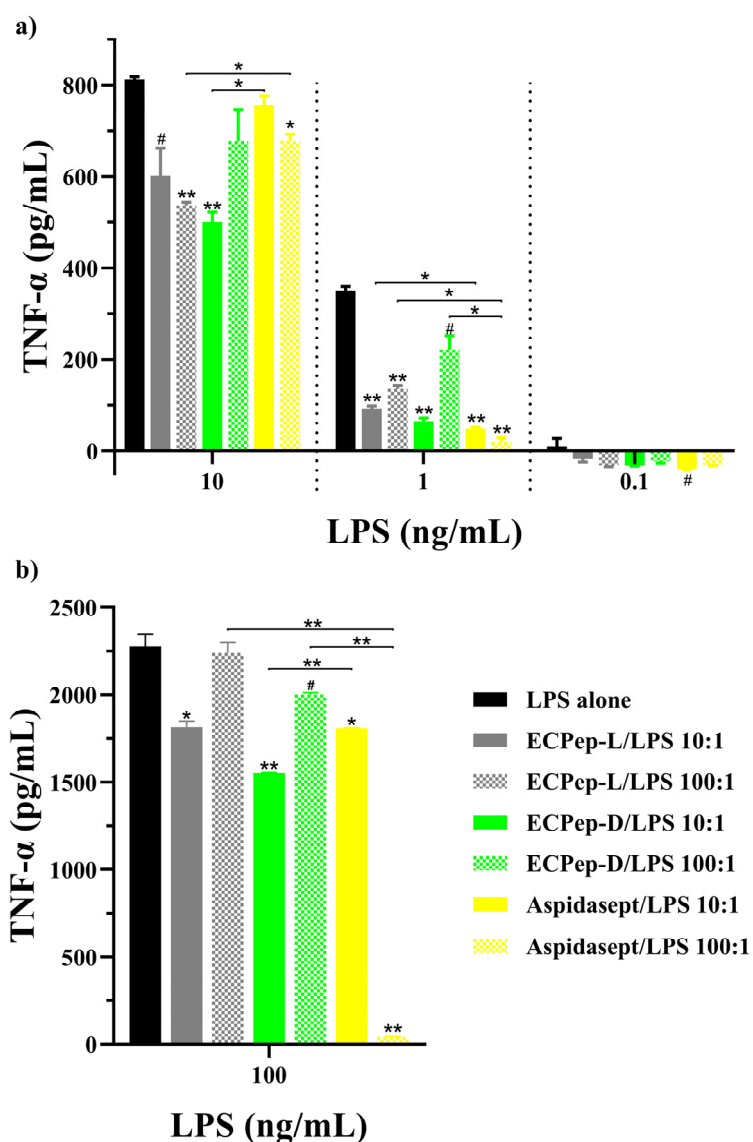

**Figure S10.** Inhibitory effect on LPS-induced TNF- $\alpha$  cytokine release. **a)** and **b)** Different concentration of LPS R60-induced secretion of TNF- $\alpha$  by human mononuclear cells and the inhibitory effect in the presence of the peptides ECPep-L, ECPep-D and Aspidasept<sup>®</sup> was calculated. Unpaired t-test has been used for statistical comparison between peptides and Aspidasept<sup>®</sup> within the same amount of LPS. Significant differences were compared with LPS alone sample when no group is indicated (\*\* $P < 0.01$ , \* $P < 0.05$ , # $P < 0.1$ ).
